# Supplementary material for: Rapid synthesis of a BODIPY derivative serving as a highly selective and sensitive fluorescence chemosensor for Hg2+ ion detection
Source: Royal Society of Chemistry journal article supplement (doi:10.1039/d3nj03275b), 2024-01-01
Supplement: d3nj03275b1.pdf [file d3nj03275b1.pdf]

**Supporting information for**

**Rapid Synthesis of a BODIPY Derivative Serving as a Highly Selective and Sensitive Fluorescence Chemosensor for Hg<sup>2+</sup> Ion Detection**

Shun-Qiang Xu,<sup>a,†</sup> Ting-Yu Yang,<sup>a,†</sup> Po-Tan Huang,<sup>a</sup> Chi-Heng Yang,<sup>a</sup> Orawan Khantamat,<sup>b</sup> Leong-Peng Chan,<sup>c,d</sup> Chien-Hung Li<sup>a,e\*</sup>

<sup>a</sup>*Department of Medicinal and Applied Chemistry, Kaohsiung Medical University, Kaohsiung 80708, Taiwan*

<sup>b</sup>*Department of Biochemistry, Faculty of Medicine, Chiang Mai University, Chiang Mai 50200, Thailand*

<sup>c</sup>*Department of Otorhinolaryngology-Head and Neck Surgery, Kaohsiung Municipal Ta-Tung Hospital and Kaohsiung Medical University Hospital, Kaohsiung 80708, Taiwan*

<sup>d</sup>*Faculty of Medicine, College of Medicine, Kaohsiung Medical University, Kaohsiung 80708, Taiwan*

<sup>e</sup>*Department of Medical Research, Kaohsiung Medical University, Kaohsiung 80708, Taiwan*

chli@kmu.edu.tw

**Table of contents**

|                                                                  |    |
|------------------------------------------------------------------|----|
| NMR spectra.....                                                 | 2  |
| Recent BODIPY-based Fluorophores for detecting Hg(II) ions ..... | 6  |
| Crystallographic Data .....                                      | 8  |
| Photophysical Data.....                                          | 8  |
| Computational Data.....                                          | 9  |
| Infrared Spectroscopy.....                                       | 10 |

<sup>†</sup> These authors are contributed equally to this work.

### NMR spectra

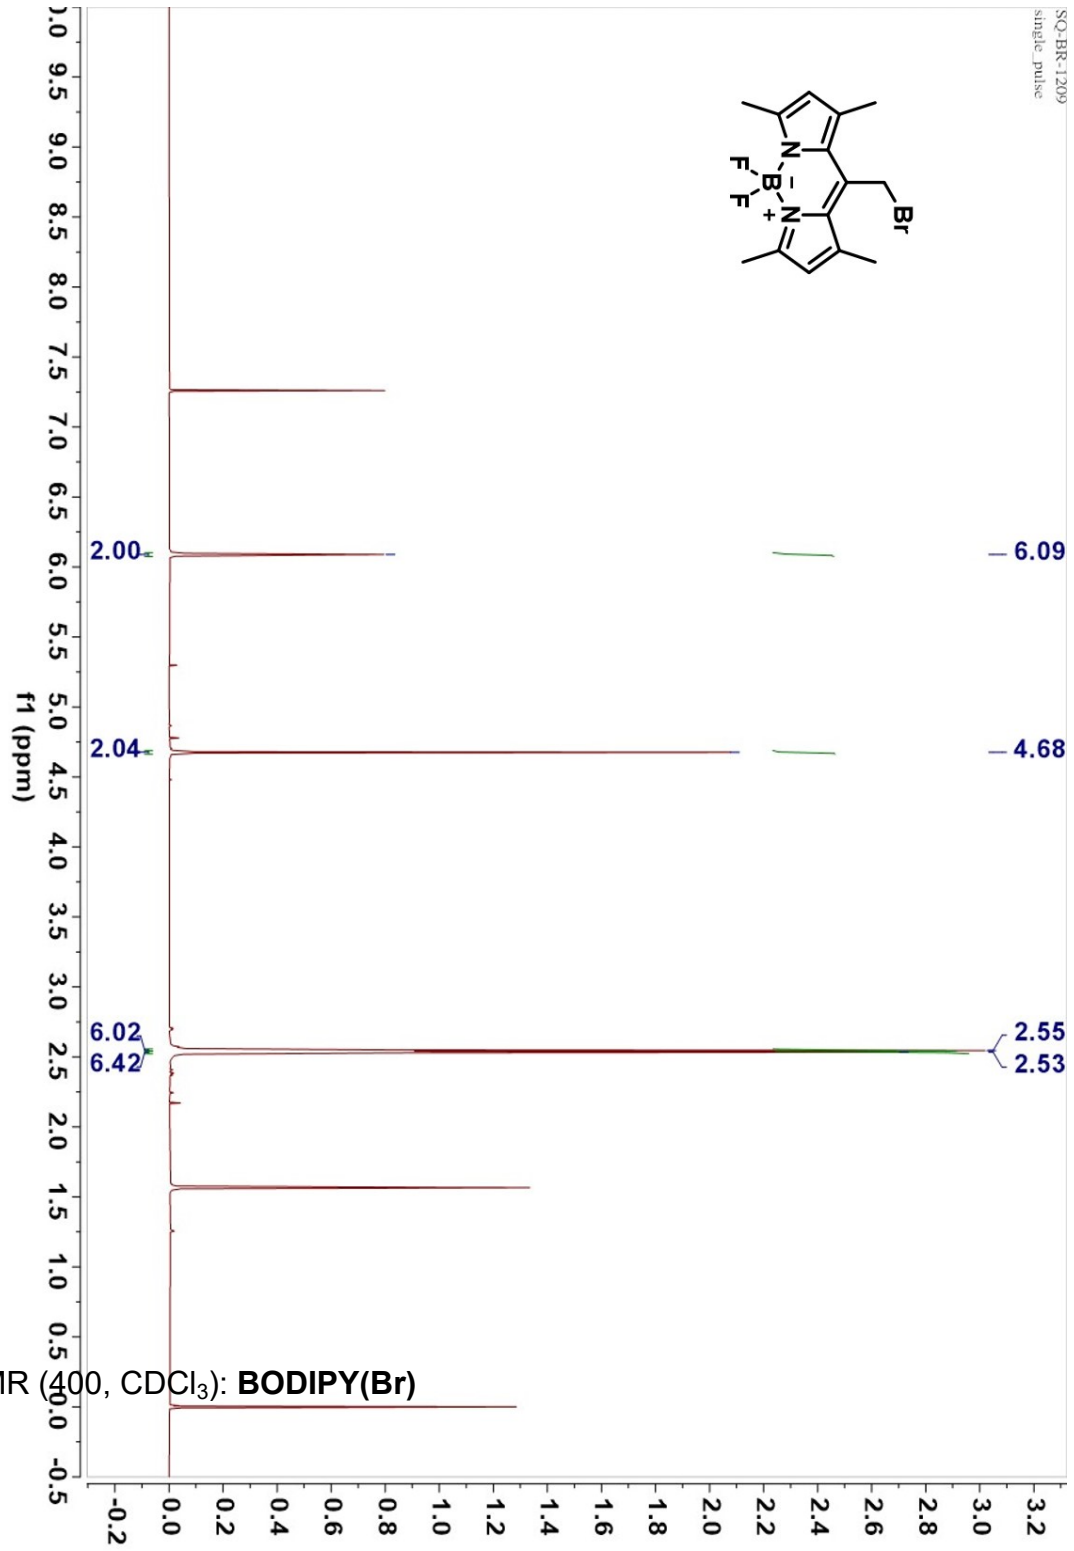

Figure S1. <sup>1</sup>H NMR (400, CDCl<sub>3</sub>): BODIPY(Br)

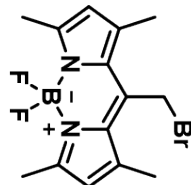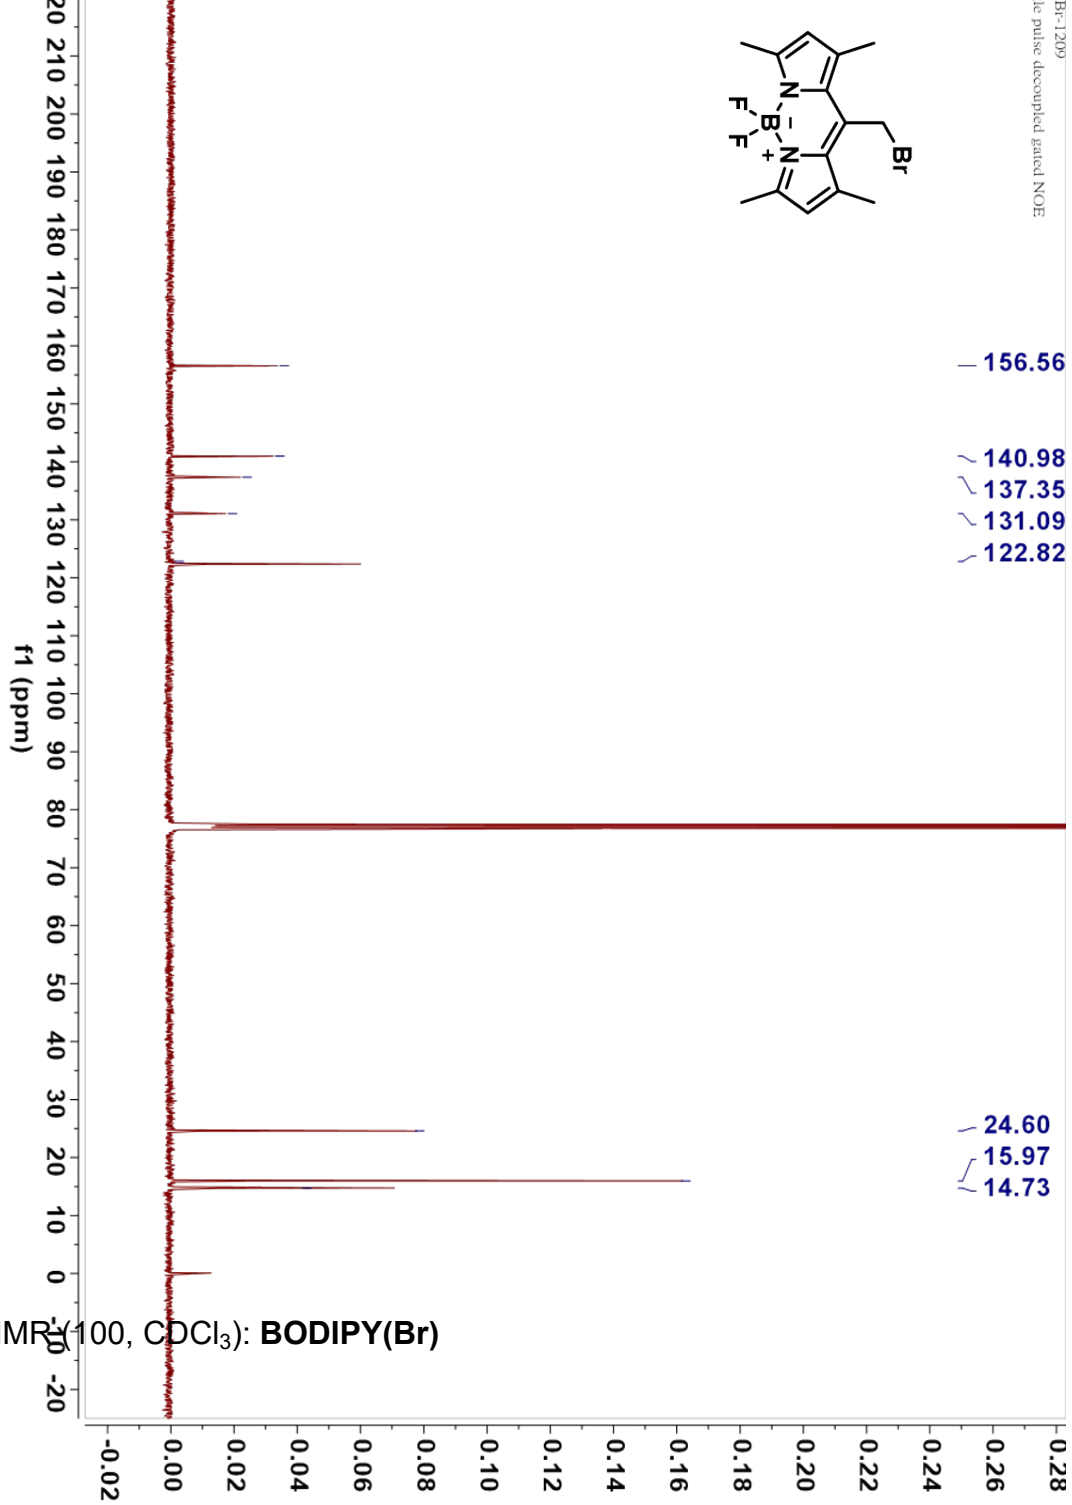

Figure S2. <sup>13</sup>C NMR (100, CDCl<sub>3</sub>): BODIPY(Br)

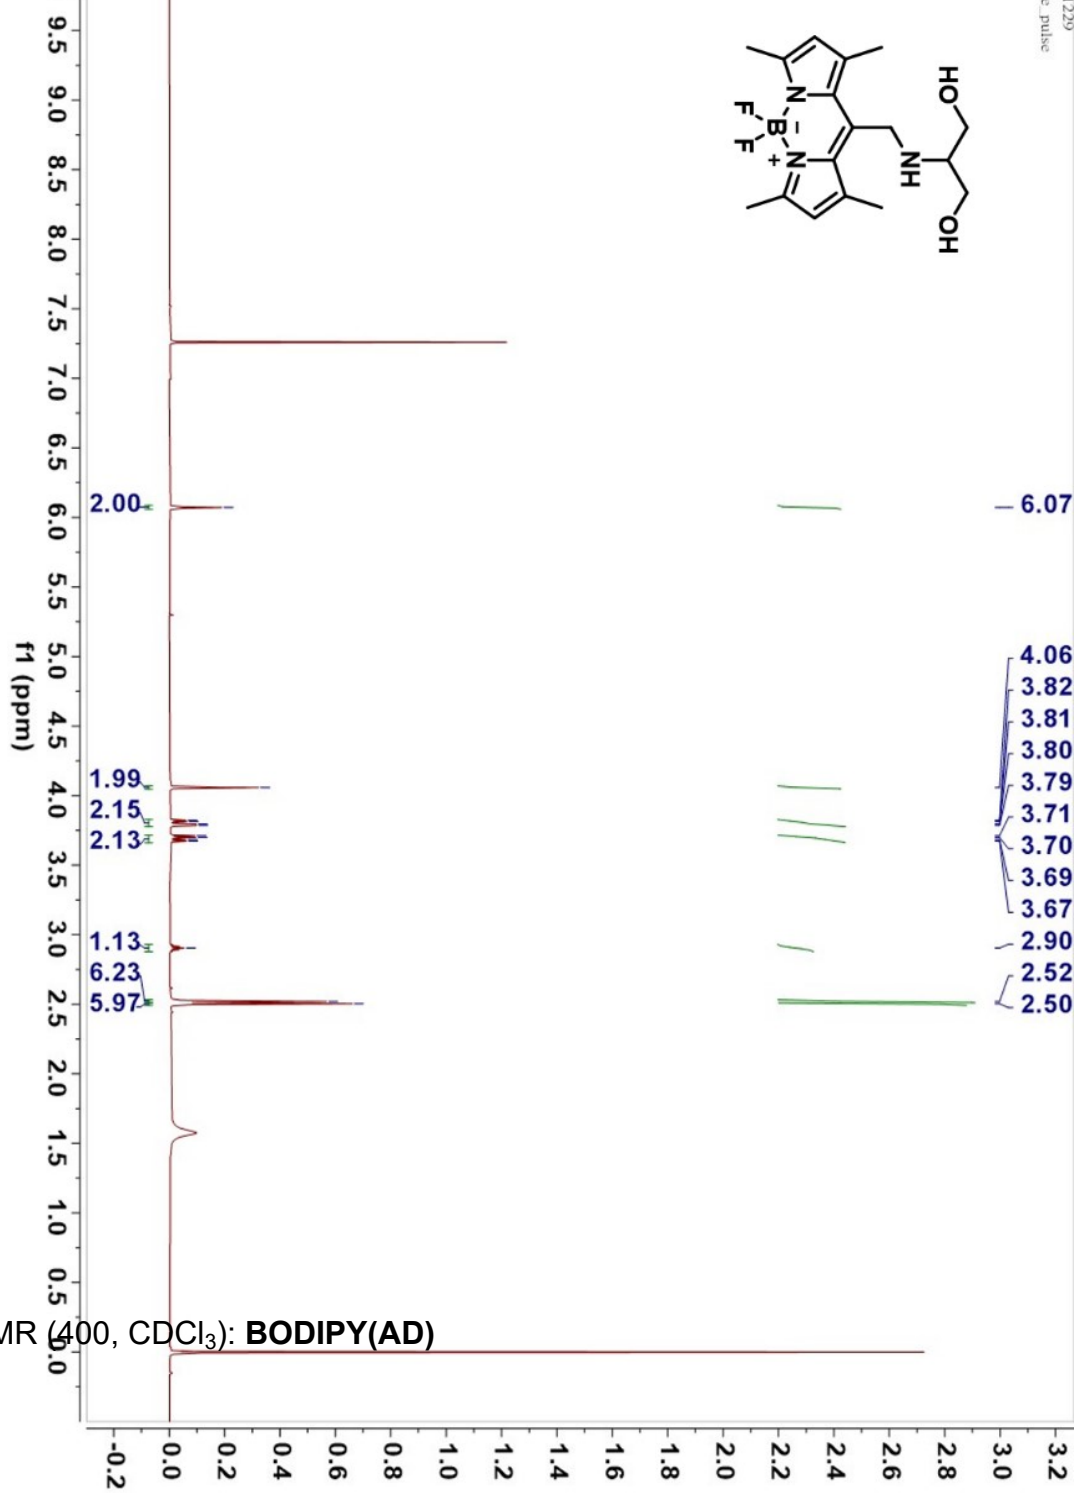

Figure S3. <sup>1</sup>H NMR (400, CDCl<sub>3</sub>): BODIPY(AD)

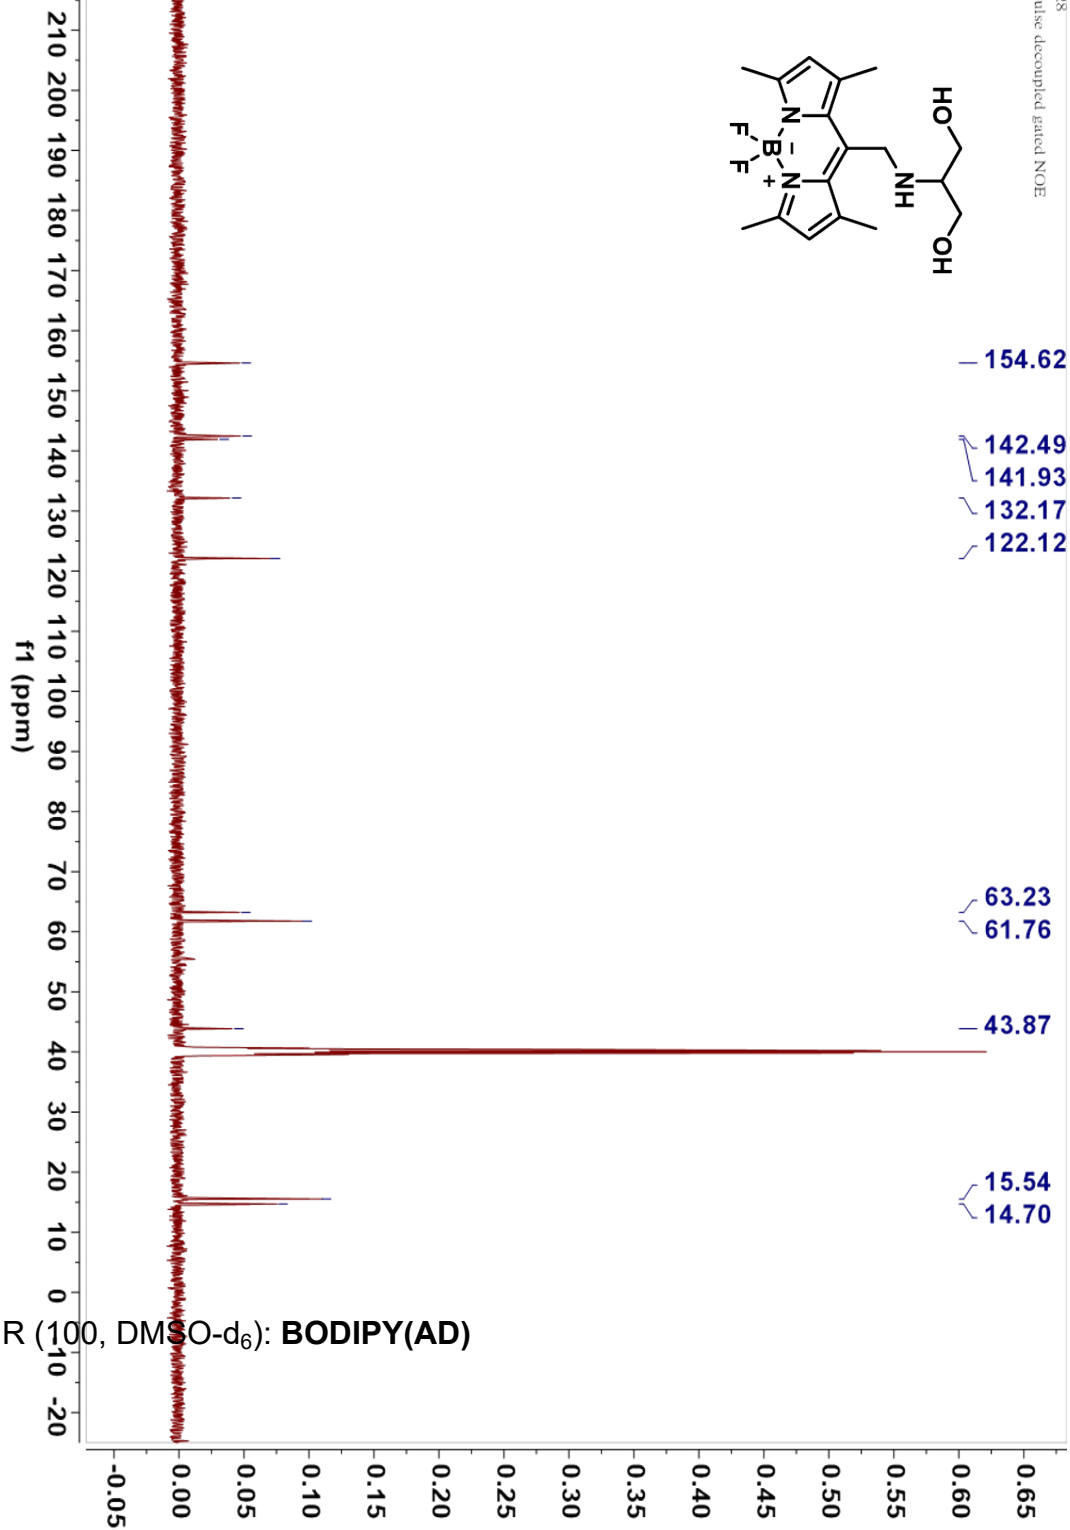

**Figure S4.**  $^{13}\text{C}$  NMR (100,  $\text{DMSO-d}_6$ ): **BODIPY(AD)**

**Table S1.** Recent BODIPY-based fluorophores for detecting  $\text{Hg(II)}$  ions.

| Structures                                                                          | Detection Limit    | Number of Synthetic Steps | Reaction time and overall yield | References |
|-------------------------------------------------------------------------------------|--------------------|---------------------------|---------------------------------|------------|
| 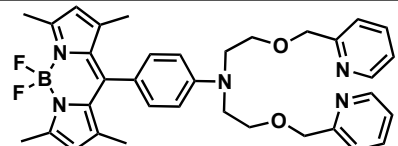 | 0.18 $\mu\text{M}$ | 4 steps                   | 48 h, 17.8%                     | 1          |

|                                                                                     |         |         |             |   |
|-------------------------------------------------------------------------------------|---------|---------|-------------|---|
| 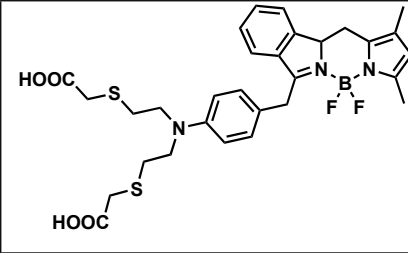   | 5.7 nM  | 7 steps | 76 h, 9.2%  | 2 |
|    | 0.09 μM | 4 steps | 53 h, 1.5%  | 3 |
|   | 0.07 μM | 5 steps | 70 h, 7.6%  | 4 |
|  | 99 ppm  | 3 steps | 6.5 h, 7.9% | 5 |
|  | 0.7 μM  | 2 steps | 19 h, 16.8% | 6 |

|                                                                                   |              |         |             |   |
|-----------------------------------------------------------------------------------|--------------|---------|-------------|---|
| 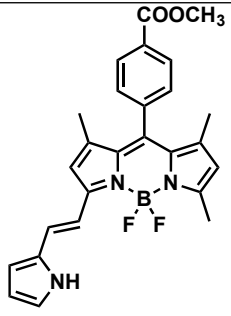 | 0.05 $\mu$ M | 2 steps | 22 h, 3.4%  | 7 |
|  | 0.9 $\mu$ M  | 3 steps | 36 h, 24.0% | 8 |

**Table S2.** Crystal data and structure refinement for BODIPY(AD)

|                     |                            |
|---------------------|----------------------------|
| Identification code | K10911-CHL-A(SQ-dioxide)   |
| Empirical formula   | $C_{34}H_{48}B_2F_4N_6O_4$ |
| Formula weight      | 704.42                     |
| Temperature/K       | 113(2)                     |
| Crystal system      | monoclinic                 |
| Space group         | $P2_1/n$                   |
| $a/\text{\AA}$      | 9.00305(16)                |

|                                             |                                                   |
|---------------------------------------------|---------------------------------------------------|
| b/Å                                         | 17.8739(4)                                        |
| c/Å                                         | 21.0833(3)                                        |
| $\alpha/^\circ$                             | 90                                                |
| $\beta/^\circ$                              | 91.3815(15)                                       |
| $\gamma/^\circ$                             | 90                                                |
| Volume/Å <sup>3</sup>                       | 3391.73(10)                                       |
| Z                                           | 4                                                 |
| $\rho_{\text{calc}}/\text{mg}/\text{mm}^3$  | 1.379                                             |
| $\mu/\text{mm}^{-1}$                        | 0.105                                             |
| F(000)                                      | 1496.0                                            |
| Crystal size/mm <sup>3</sup>                | 0.15 × 0.15 × 0.13                                |
| 2 $\theta$ range for data collection        | 4.558 to 50°                                      |
| Index ranges                                | -10 ≤ h ≤ 10, -19 ≤ k ≤ 21, -25 ≤ l ≤ 25          |
| Reflections collected                       | 32271                                             |
| Independent reflections                     | 5960[R(int) = 0.0325]                             |
| Data/restraints/parameters                  | 5960/0/475                                        |
| Goodness-of-fit on F <sup>2</sup>           | 1.045                                             |
| Final R indexes [ $I \geq 2\sigma(I)$ ]     | R <sub>1</sub> = 0.0435, wR <sub>2</sub> = 0.1160 |
| Final R indexes [all data]                  | R <sub>1</sub> = 0.0537, wR <sub>2</sub> = 0.1212 |
| Largest diff. peak/hole / e Å <sup>-3</sup> | 0.73/-0.67                                        |
| CCDC number                                 | 2272046                                           |

**Table S3.** Absorption and fluorescence data of BODIPY(AD).

| Solvents | $\lambda_{\text{ab}}$ (nm) | $\epsilon$ (L/mol·cm) | $\lambda_{\text{em}}$ (nm) | $\Phi^a$ | $\Delta_{\text{st}}$ (cm <sup>-1</sup> )<br>1) | $\epsilon^b$ |
|----------|----------------------------|-----------------------|----------------------------|----------|------------------------------------------------|--------------|
| Toluene  | 512                        | 66000                 | 522                        | 84.5%    | 374                                            | 2.38         |
| DCM      | 511                        | 111800                | 520                        | 51.2%    | 338                                            | 8.93         |
| Acetone  | 506                        | 86400                 | 513                        | 1.96%    | 307                                            | 20.7         |
| MeOH     | 506                        | 101600                | 515                        | 6.85%    | 345                                            | 32.7         |
| DMSO     | 508                        | 78600                 | 522                        | 6.48%    | 528                                            | 46.68        |



|                          |     |       |     |      |     |       |
|--------------------------|-----|-------|-----|------|-----|-------|
| DMSO (Hg <sup>2+</sup> ) | 520 | 54900 | 536 | 118% | 574 | 46.68 |
|--------------------------|-----|-------|-----|------|-----|-------|

*a*: The  $\Phi$  of DCM was absolute quantum yield, and the  $\Phi$  of the others were relative quantum yields by using the

DCM sample as standard. *b*: Dielectric constant of each solvent

## Computational data

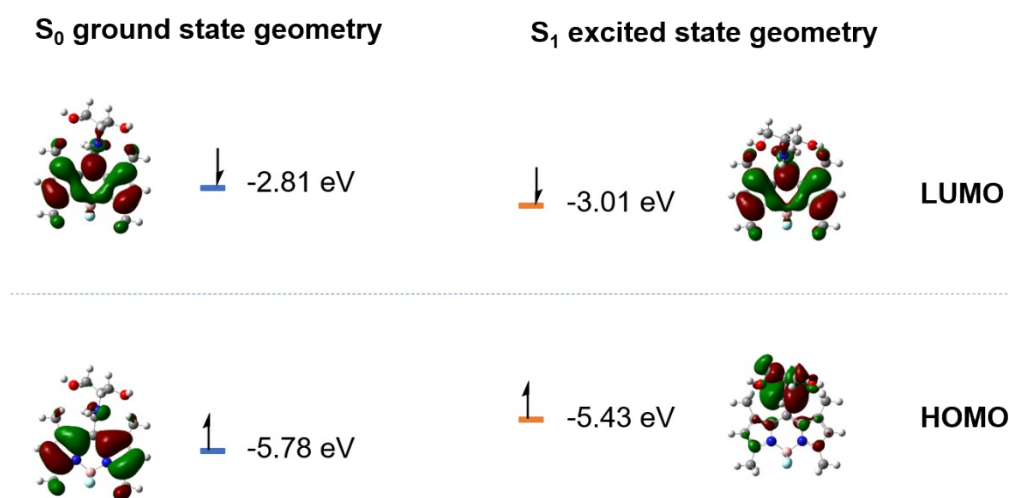

**Figure S5.** TD-DFT calculations for BODIPY(AD) in DMSO. The dominant configuration of  $S_1$  excited states at  $S_0$  ground state geometry (left) and at  $S_1$  excited state geometry (right) showed that ICT process occurred when the molecule was excited. The poor overlap of wavefunctions between the excited state and the ground state at  $S_1$  geometry caused the diminishment of fluorescence.

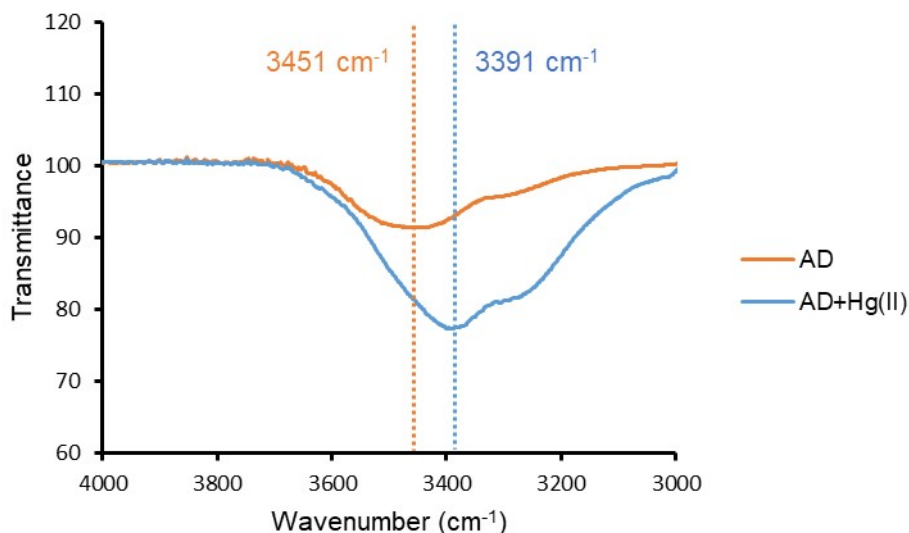

**Figure S6.** FI-IR spectra demonstrated that N-H and O-H peak shifted after adding  $\text{Hg}^{2+}$  ion to BODIPY(AD).

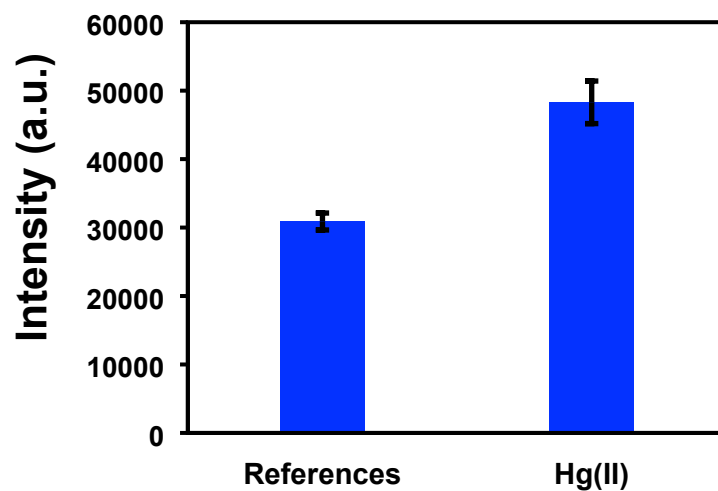

**Figure S7.** Fluorescence of BODIPY(AD) in the buffer solution with and without  $\text{Hg}^{2+}$  ions.

### References

1. A. Maity, A. Sil, S. Nad, S. K. Patra, *Sens. Actuators, B* 2018, **255**, 299-308.
2. B. Zhou, S. Qin, B. Chen, Y. Han, *Tetrahedron Lett.*, 2018, **59**, 4359-4363.
3. Y. Huang, C.-F. Li, W.-J. Shih, H.-Y. Tan, Z.-Z. He, L. Zheng, F. Liu, J.-W. Yan, *Talanta* 2019, **198**, 390 – 397.
4. Z. Gu, H. Cheng, X. Shen, T. He, K. Jiang, H. Qiu, Q. Zhang, S. Yin *Spectrochim. Acta, Part A* 2018, **203**, 315–323.
5. M. L. Presti, R. Martínez-Máñez, J. V. Ros-Lis, R. M. F. Batista, S. P. G. Costa, M. M. M. Raposo, F. Sancenón *New. J. Chem.* 2018, **42**, 7863–7868.
6. Z. Xue, T. Liu, H. Liu *Dyes Pigm.*, 2019, **165**, 65–70.
7. C. Chan, H. Liu, Z. Xue *Microchem. J.* 2021, **166**, 106247.

8. H. Kirpik, M. Koe, R. B. P. Elmes, M. Karabork *J. Photochem. Photobiol. A* 2024, **451**, 115541.
